# Supplementary material
Source: PubMed Central journal article supplement (PMC7674199)
Supplement: NIHMS1617724-supplement-1.pdf [file NIHMS1617724-supplement-1.pdf]

## Supplemental Information

**Title:** Common neural responses to romantic rejection and acceptance in healthy adults

**Authors:** David T. Hsu<sup>a,b</sup>, Anjali Sankar<sup>a</sup>, Mohammad Malik<sup>a,b</sup>, Scott A. Langenecker<sup>c</sup>, Brian J. Mickey<sup>c</sup>, Tiffany M. Love<sup>c</sup>

<sup>a</sup>Department of Psychiatry, Stony Brook University

<sup>b</sup>Department of Psychology, Stony Brook University

<sup>c</sup>Department of Psychiatry, University of Utah

### Supplemental Data

| <b>Contrast</b>       | <b>Region</b>                                                  | <b>Brodmann Area</b> | <b>MNI coordinates (x,y,z) mm</b> | <b>k<sub>E</sub> (voxels)</b> | <b>t</b> |
|-----------------------|----------------------------------------------------------------|----------------------|-----------------------------------|-------------------------------|----------|
| Rejection             | L Superior Frontal Gyrus                                       | 6                    | -8, 10, 68                        | 240                           | 6.13     |
| -Neutral<br>(Rej-Neu) | L Ventrolateral Prefrontal Cortex (vIPFC) (includes Operculum) | 47/12                | -42, 22, -4                       | 475                           | 5.46     |
|                       | R Superior Frontal Gyrus                                       | 9                    | 10, 50, 44                        | 549                           | 5.46     |
|                       | L Occipital Gyrus                                              | 18                   | -20, -88, -12                     | 60                            | 5.36     |
|                       | R vIPFC/Anterior Insula (AI)                                   | 47/12                | 28, 18, -12                       | 220                           | 5.28     |
|                       | R Occipital Gyrus                                              | 19                   | 28, -84, -18                      | 23                            | 4.83     |
|                       | L Medial Temporal Gyrus                                        | 21                   | -54, -30, -4                      | 154                           | 4.82     |
|                       | L Medial Frontal Gyrus                                         | 6                    | -44, 0, 52                        | 155                           | 4.77     |
|                       | R vIPFC                                                        | 47/12                | 50, 28, 2                         | 111                           | 4.49     |
|                       | L Supramarginal Gyrus                                          | 39                   | -56, -50, 30                      | 38                            | 4.37     |
|                       | L Putamen                                                      |                      | -22, 10, 8                        | 19                            | 4.30     |
|                       | R Superior Frontal Gyrus                                       | 6                    | 10, 22, 62                        | 32                            | 4.28     |
|                       | L Occipital Gyrus                                              | 19                   | -34, -70, -18                     | 22                            | 4.26     |
|                       | L Precentral Gyrus                                             | 6                    | -46, -2, 36                       | 14                            | 3.96     |
|                       | L Superior Frontal Gyrus                                       | 8                    | -10, 36, 50                       | 14                            | 3.96     |
|                       | L Medial Temporal Gyrus                                        | 21                   | -46, -48, 10                      | 18                            | 3.94     |
|                       | L Caudate                                                      |                      | -16, 4, 18                        | 18                            | 3.92     |
|                       | L Cerebellum                                                   |                      | -14, -82, -22                     | 10                            | 3.78     |
| Acceptance            | L Occipital Gyrus                                              | 19                   | -30, -78, -12                     | 958                           | 6.72*    |
| -Neutral<br>(Acc-Neu) | L Inferior Frontal Gyrus                                       | 45                   | -48, 22, 8                        | 1303                          | 5.93     |
|                       | includes L vIPFC (Operculum)                                   | 47/12                | -42, 20, -2                       |                               | 5.60     |
|                       | R vIPFC (includes AI)                                          | 47/12                | 40, 24, -6                        | 740                           | 5.58     |
|                       | R Caudate                                                      |                      | 8, 8, 2                           | 220                           | 5.48     |
|                       | L Superior Temporal Gyrus                                      | 21                   | -54, -44, 8                       | 238                           | 5.33     |
|                       | R Superior Frontal Gyrus                                       | 9                    | 8, 54, 24                         | 236                           | 5.12     |
|                       | L Superior Frontal Gyrus                                       | 6                    | -2, 10, 58                        | 613                           | 5.12     |
|                       | L Caudate                                                      |                      | -14, 12, 6                        | 200                           | 4.92     |
|                       | L Fusiform Gyrus                                               | 37                   | -38, -46, -16                     | 75                            | 4.82     |
|                       | R Superior Frontal Gyrus                                       | 8                    | 12, 20, 38                        | 15                            | 4.80     |
|                       | Cerebellum                                                     |                      | 0, -54, -32                       | 43                            | 4.69     |
|                       | R Fusiform Gyrus                                               | 37                   | 32, -52, -16                      | 95                            | 4.62     |
|                       | R Occipital Gyrus                                              | 18                   | 24, -92, 2                        | 336                           | 4.59     |
|                       | L Superior Frontal Gyrus                                       | 10                   | -22, 54, 26                       | 58                            | 4.51     |
|                       | L Caudate                                                      |                      | -16, -2, 20                       | 66                            | 4.41     |
|                       | L Superior Frontal Gyrus                                       | 9                    | -2, 40, 28                        | 151                           | 4.38     |
|                       | R Superior Temporal Gyrus                                      | 22                   | 50, -18, -8                       | 75                            | 4.37     |
|                       | L Posterior Orbital Gyrus                                      | 47                   | -26, 26, -16                      | 13                            | 4.26     |

|         |                                     |    |              |      |       |
|---------|-------------------------------------|----|--------------|------|-------|
|         | L Superior Frontal Gyrus            | 8  | -14, 40, 48  | 54   | 4.16  |
|         | L Frontal Operculum                 | 45 | -30, 24, 14  | 11   | 4.11  |
|         | R Precentral Gyrus                  | 6  | 54, -4, 38   | 15   | 3.96  |
|         | R Superior Frontal Gyrus            | 8  | 8, 40, 48    | 15   | 3.92  |
|         | R Precentral Gyrus                  | 44 | 46, 6, 26    | 10   | 3.91  |
|         | L Substantia Nigra                  |    | -8, -12, -16 | 12   | 3.90  |
|         | L Sup. Transverse Frontopolar Gyrus | 10 | -2, 58, 10   | 24   | 3.85  |
|         | R Occipital Gyrus                   | 17 | 8, -94, 0    | 24   | 3.78  |
|         | L Superior Temporal Gyrus           | 39 | -46, -50, 28 | 14   | 3.75  |
|         | R Precentral Gyrus                  | 6  | 42, 2, 40    | 21   | 3.68  |
|         | L Amygdala                          |    | -20, -4, -12 | 17   | 3.66  |
|         | R Precentral Gyrus                  | 6  | 46, 6, 50    | 11   | 3.54  |
| Neu-Rej | L Precuneus                         | 7  | -4, -60, 48  | 1705 | 6.41* |
|         | L Posterior Insula                  | 13 | -38, -24, 0  | 82   | 5.75  |
|         | L Inferior Temporal Gyrus           | 37 | -56, -56, -6 | 158  | 5.51  |
|         | L Medial Frontal Gyrus              | 6  | -28, 8, 58   | 204  | 5.42  |
|         | R Parietooccipital Area             | 39 | 46, -72, 40  | 50   | 4.57  |
|         | L Parietooccipital Area             | 19 | -42, -82, 26 | 58   | 4.43  |
|         | R Postcentral Gyrus                 | 1  | 30, -42, 62  | 33   | 4.25  |
|         | L Parietal Operculum                | 40 | -48, -34, 20 | 63   | 4.19  |
|         | R Medial Temporal Gyrus             | 37 | 58, -54, -2  | 27   | 4.17  |
|         | L Parietal Operculum                | 41 | -66, -12, 10 | 60   | 4.15  |
|         | R Medial Frontal Gyrus              | 6  | 30, 12, 54   | 12   | 4.13  |
|         | L Parietooccipital Transition Zone  | 19 | -34, -86, 36 | 12   | 4.10  |
|         | L Parahippocampal Gyrus             | 36 | -32, -42, -8 | 22   | 4.05  |
|         | L Angular Gyrus                     | 39 | -38, -52, 38 | 10   | 4.01  |
|         | L Occipital Gyrus                   | 18 | -12, -68, 24 | 45   | 3.95  |
|         | R Superior Frontal Gyrus            | 9  | 28, 38, 36   | 20   | 3.90  |
|         | R Superior Frontal Gyrus            | 31 | 8, -22, 44   | 10   | 3.86  |
|         | R Superior Parietal Lobule          | 7  | 16, -48, 70  | 31   | 3.80  |
|         | R Precuneus                         | 31 | 8, -60, 18   | 15   | 3.74  |
|         | R Superior Frontal Gyrus            | 6  | 18, -6, 68   | 11   | 3.74  |
| Neu-Acc | R Precuneus                         | 31 | 6, -44, 52   | 17   | 4.08  |
|         | R Superior Frontal Gyrus            | 6  | 28, 20, 62   | 10   | 3.85  |
| Rej-Acc | <i>No clusters</i>                  |    |              |      |       |
| Acc-Rej | L Paracentral Lobule                | 7  | -6, -46, 66  | 260  | 5.21  |
|         | R Medial Temporal Gyrus             | 37 | 58, -54, -4  | 36   | 5.02  |
|         | L Parietooccipital Transition Zone  | 19 | -40, -86, 24 | 28   | 4.82  |
|         | L Superior Frontal Gyrus            | 8  | -2, 36, 30   | 69   | 4.77  |
|         | L Medial Frontal Gyrus              | 44 | -40, 14, 28  | 35   | 4.62  |
|         | R Inferior Frontal Gyrus            | 45 | 60, 30, 12   | 13   | 4.60  |
|         | R Cingulate Gyrus                   | 24 | 6, -8, 38    | 45   | 4.58  |
|         | R Intermediate Orbital Gyrus        | 11 | 20, 42, -12  | 17   | 4.52  |
|         | L Superior Parietal Lobule          | 7  | -18, -42, 62 | 49   | 4.42  |
|         | L Superior Frontal Gyrus            | 8  | -24, 34, 46  | 13   | 4.38  |
|         | L Medial Frontal Gyrus              | 6  | -28, 8, 58   | 73   | 4.34  |
|         | L Superior Parietal Lobule          | 7  | -6, -72, 52  | 16   | 4.32  |
|         | L Pretectal Area                    |    | -8, -30, -8  | 19   | 4.29  |
|         | L Cingulate Gyrus                   | 23 | -4, -58, 14  | 110  | 4.26  |
|         | R Cingulate Gyrus                   | 32 | 6, 8, 34     | 55   | 4.25  |
|         | L Parietal Operculum                | 40 | -42, -32, 22 | 37   | 4.22  |

|                                    |    |               |    |      |
|------------------------------------|----|---------------|----|------|
| L Superior Frontal Gyrus           | 6  | -10, -18, 64  | 21 | 4.16 |
| L Fusiform Gyrus                   | 19 | -10, -64, -8  | 24 | 4.10 |
| L Cerebellum                       |    | -10, -50, -22 | 57 | 4.09 |
| R Inferior Rostral Gyrus           | 10 | 12, 48, -10   | 97 | 4.08 |
| L Superior Frontal Gyrus           | 8  | -4, 30, 40    | 34 | 4.03 |
| L Superior Temporal Gyrus          | 22 | -66, -40, 18  | 14 | 4.01 |
| L Precentral Gyrus                 | 8  | -34, 2, 32    | 13 | 3.99 |
| L Caudate                          |    | -8, 14, 0     | 18 | 3.95 |
| L Parietooccipital Transition Zone | 7  | -28, -80, 42  | 12 | 3.93 |
| R Superior Frontal Gyrus           | 6  | 24, -2, 62    | 11 | 3.91 |
| L Cerebellum                       |    | -18, -40, -24 | 13 | 3.90 |
| L Occipital Gyrus                  | 18 | -40, -90, 6   | 15 | 3.90 |
| R Frontal Operculum                | 44 | 44, 16, 4     | 14 | 3.87 |
| R Cerebellum                       |    | 4, -54, -34   | 16 | 3.79 |
| R Cingulate Gyrus                  | 32 | 10, 18, 36    | 11 | 3.77 |
| L Cingulate Gyrus                  | 23 | -4, -38, 36   | 21 | 3.77 |
| R Frontal Operculum                | 1  | 44, -16, 18   | 17 | 3.70 |
| L Superior Frontal Gyrus           | 6  | -2, -20, 74   | 16 | 3.68 |

**Supplemental Table S1.** Activation in the entire brain (no masking) in the entire sample ( $n = 36$ ). One-sample  $t$ -tests were performed for each contrast, controlling for sex and age. Whole-brain uncorrected threshold was set at  $P < 0.001$  with minimum extent threshold of  $k_E > 10$  voxels. Voxel-wise peaks are listed in MNI standard space (Montreal Neurological Institute). \*Whole-brain family-wise error (FWE)-corrected  $P < 0.05$  (2-tailed).

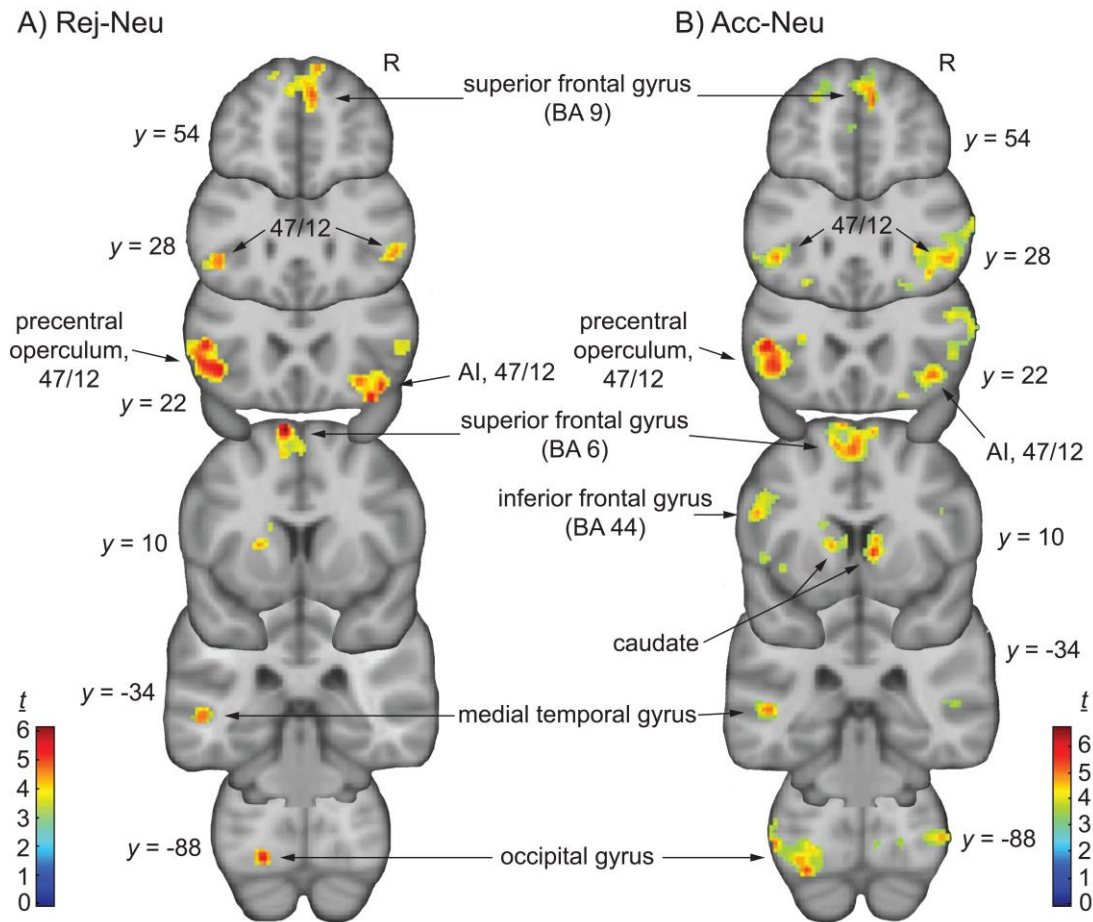

**Supplemental Fig. S1. Distribution of neural activation.** A) Rej-Neu and B) Acc-Neu contrasts (controlling for sex and age) from Table S1. R, right; Coordinates in Montreal Neurological Institute stereotactic space. Contrast  $t$  map displayed at  $P < 0.001$  (one-sample  $t$ -tests, whole-brain uncorrected, no masking),  $k_E > 10$ .

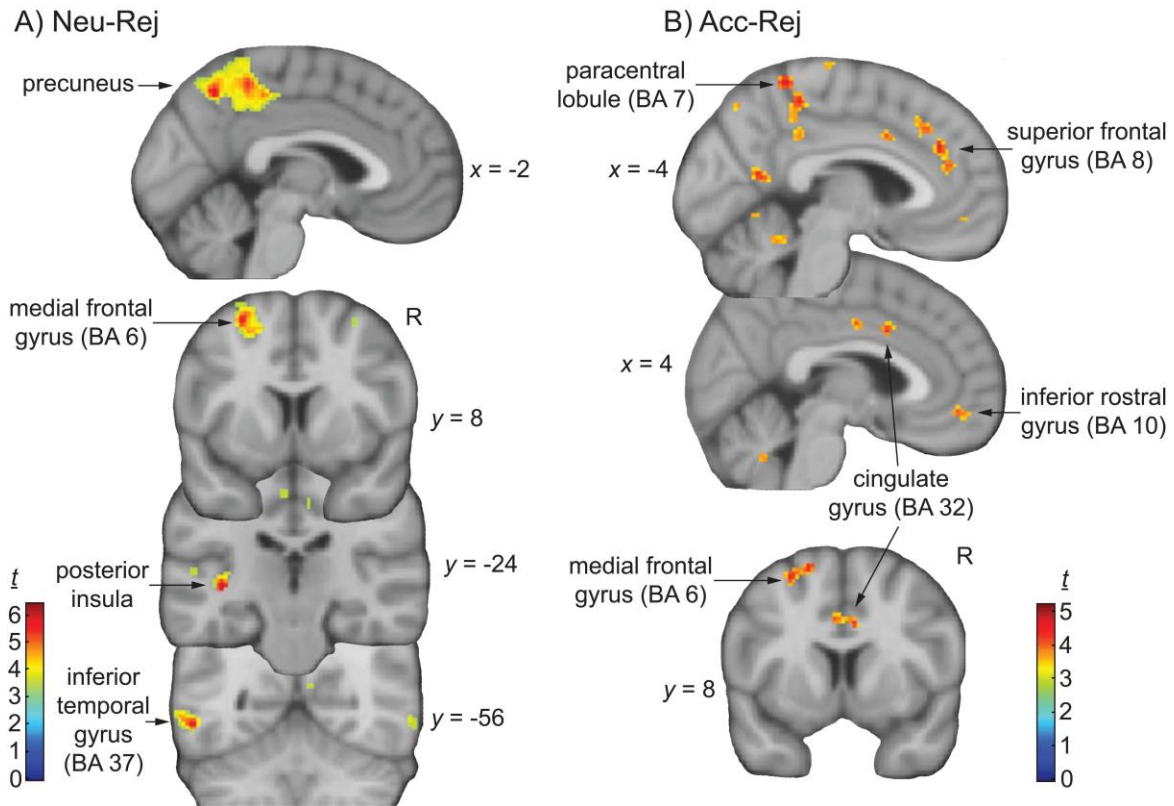

**Supplemental Fig. S2. Distribution of neural activation.** A) Neu-Rej and B) Acc-Rej contrasts (controlling for sex and age) from Table S1. R, right; Coordinates in Montreal Neurological Institute stereotactic space. Contrast  $t$  map displayed at  $P < 0.001$  (one-sample  $t$ -tests, whole-brain uncorrected, no masking),  $k_E > 10$ .

#### *Activation in the precuneus*

An exploration of significant whole-brain voxel-wise activation ( $k_E > 10$ , whole-brain FWE-corrected  $P < 0.05$ , two-tailed) yielded an unexpected finding of significant *deactivation* in the left precuneus during rejection (Neu-Rej) ( $t = 6.41$ ,  $P_{FWE\text{-whole-brain}} = 0.034$ ;  $k_E = 1705$ ; peak activation:  $-4, -60, 48$ ; **Table S1, Fig. S2C**). Previous work has shown that the precuneus, which is part of the “default mode” network<sup>1</sup>, is involved in self-related mental representations during rest<sup>2</sup> and reflection of one’s own personality traits<sup>2</sup>. Thus, it is possible that during Neu blocks, when participants are viewing their own picture plus a picture of a person who had “not completed” their ratings, participants were left with more of an opportunity for self-reflection compared to blocks when they were rejected. Although it is not clear why activation in the precuneus was not found during Neu-Acc, it is possible that being accepted caused more first-person self-reflection similar to Neu, whereas being rejected caused more engagement of goal-directed actions, which is associated with reductions in default mode of brain function<sup>1</sup>. Given that the finding in the precuneus was unexpected, and no data on self-reflection was collected, our interpretation of this finding is speculative and requires further study.

| Contrast | ROI                                       | MNI coordinates<br>(x,y,z) mm | t    | $k_E$<br>(voxels) | $P_{unadjusted}$ | $P_{adjusted}$ |
|----------|-------------------------------------------|-------------------------------|------|-------------------|------------------|----------------|
| Rej-Neu  | L Dorsal Anterior Cingulate Cortex (dACC) | No clusters                   |      |                   |                  |                |
|          | R dACC                                    | No clusters                   |      |                   |                  |                |
|          | L vIPFC                                   | -42, 22, -4                   | 5.46 | 131               | 0.0018           | 0.036*         |
|          | R vIPFC                                   | 38, 22, -20                   | 5.24 | 190               | 0.0032           | ns             |
|          | L AI                                      | -40, 20, -4                   | 4.91 | 12                | 0.0032           | ns             |
|          | R AI                                      | 28, 18, -12                   | 5.28 | 20                | 0.0013           | 0.026*         |
|          | L Nucleus Accumbens (NAcc)                | No clusters                   |      |                   |                  |                |
|          | R NAcc                                    | No clusters                   |      |                   |                  |                |
|          | L Amygdala (AMY)                          | No clusters                   |      |                   |                  |                |
|          | R AMY                                     | No clusters                   |      |                   |                  |                |
| Acc-Neu  | L dACC                                    | -2, 36, 26                    | 3.77 | 16                | 0.049            | ns             |
|          | R dACC                                    | 10, 18, 36                    | 3.81 | 4                 | 0.063            | ns             |
|          | L vIPFC                                   | -42, 20, -4                   | 5.53 | 125               | 0.0016           | 0.032*         |
|          | R vIPFC                                   | 40, 24, -6                    | 5.58 | 299               | 0.0014           | 0.028*         |
|          | L AI                                      | -40, 20, -2                   | 5.36 | 59                | 0.0010           | 0.020*         |
|          | R AI                                      | 38, 22, -4                    | 4.36 | 39                | 0.0124           | ns             |
|          | L NAcc                                    | No clusters                   |      |                   |                  |                |
|          | R NAcc                                    | 8, 10, -2                     | 3.77 | 6                 | 0.0106           | ns             |
|          | L AMY                                     | -20, -4, -12                  | 3.66 | 15                | 0.037            | ns             |
|          | R AMY                                     | No clusters                   |      |                   |                  |                |
| Neu-Rej  | No clusters within any ROI mask           |                               |      |                   |                  |                |
| Neu-Acc  | No clusters within any ROI mask           |                               |      |                   |                  |                |

**Supplemental Table S2.** Activation in individual ROI masks in the entire sample ( $n = 36$ ). One-sample  $t$ -tests were performed for each contrast, controlling for sex and age. Whole-brain uncorrected threshold was set at  $P < 0.001$  with minimum extent threshold of  $k_E > 10$  voxels, followed by small volume correction for each ROI mask ( $k_E$  values in some ROI masks were less than 10 if clusters spread across more than one ROI mask). Voxel-wise peaks are listed in MNI standard space (Montreal Neurological Institute).  $P$  values (FWE-small volume corrected, SVC) are listed as unadjusted, or Bonferroni-adjusted for a two-tailed test ( $\times 2$ ) across 10 ROI masks ( $\times 10$ ). *No clusters* indicate no clusters present at the set threshold; \* $P < 0.05$ ; *ns*, not significant.

#### Relationship Status

Similar to our previous study<sup>3</sup>, relationship status was examined by comparing those who were single ( $n = 24$ ) with those who were in a relationship or married ( $n = 11$ ). Group-level, voxel-wise two-sample  $t$ -tests were conducted for each contrast. No significant clusters were found in the ROI mask (threshold  $P_{FWE-SVC} < 0.05$ ), or in the whole brain (threshold  $P_{FWE-whole-brain} < 0.05$ ).

| Region                               |                      | Brodman<br>Area | Center of mass, MNI<br>coordinates (x, y, z) | Voxels |
|--------------------------------------|----------------------|-----------------|----------------------------------------------|--------|
| L vIPFC<br>Operculum)                | (includes Precentral | 47/12           | -48, 20, 5                                   | 385    |
| R vIPFC<br>Operculum)                | (includes Precentral | 47/12           | 49, 27, 4                                    | 92     |
| R vIPFC (includes AI)                |                      | 47/12           | 37, 24, -9                                   | 70     |
| R Superior Frontal Gyrus             |                      | 9/10            | 4, 54, 29                                    | 182    |
| L Superior Frontal Gyrus             |                      | 6/8             | -7, 10, 63                                   | 177    |
| L Medial Frontal Gyrus               |                      | 6               | -43, -1, 52                                  | 105    |
| L Middle and Superior Temporal Gyrus |                      | 22/21           | -51, -36, 1                                  | 71     |
| L Occipital Gyrus                    |                      | 18              | -23, -86, -11                                | 50     |
| L Superior Frontal Gyrus             |                      | 8               | -10, 48, 44                                  | 15     |

**Supplemental Table S3.** Conjunction of Rej-Neu & Acc-Neu contrasts controlling for sex and age (whole-brain, no masking).

| Contrast                        | Region                          | Brodman<br>Area     | Center of mass, MNI<br>coordinates (x, y, z) | Voxels       |     |
|---------------------------------|---------------------------------|---------------------|----------------------------------------------|--------------|-----|
| Rej-Neu                         | Superior Frontal Gyrus          | 9                   | 0, 51, 37                                    | 344          |     |
|                                 | R vIPFC (includes AI)           | 47/12               | 35, 21, -14                                  | 150          |     |
|                                 | L Medial Temporal Gyrus         | 21                  | -52, -33, -3                                 | 83           |     |
|                                 | L Interior Frontal Gyrus        | 45                  | -54, 21, 1                                   | 64           |     |
|                                 | L Superior Frontal Gyrus        | 6                   | -9, 17, 61                                   | 56           |     |
|                                 | L Medial Frontal Gyrus          | 6                   | -48, 4, 51                                   | 47           |     |
|                                 | L Superior Temporal Gyrus       | 39                  | -57, -48, 29                                 | 34           |     |
|                                 | R Superior Frontal Gyrus        | 6                   | 9, 25, 61                                    | 31           |     |
|                                 | L Putamen                       |                     | -21, 9, 8                                    | 18           |     |
|                                 | R Inferior Frontal Gyrus        | 45                  | 55, 24, 5                                    | 15           |     |
|                                 | L Superior Temporal Gyrus       | 21                  | -48, -49, 11                                 | 14           |     |
|                                 | L vIPFC (includes<br>Operculum) | Precentral<br>47/12 | 47/12                                        | -42, 23, -9  | 11  |
|                                 | Acc-Neu                         | L Occipital Gyrus   | 18                                           | -35, -83, -7 | 896 |
| L Precentral Gyrus              |                                 | 44                  | -45, 9, 25                                   | 798          |     |
| R vIPFC (includes<br>Operculum) |                                 | Precentral<br>47/12 | 47/12                                        | 43, 27, 1    | 578 |
| L Superior Frontal Gyrus        |                                 | 6                   | -1, 12, 58                                   | 433          |     |
| L Superior Frontal Gyrus        |                                 | 18                  | 33, -90, -2                                  | 321          |     |
| R Occipital Gyrus               |                                 |                     | 10, 11, 6                                    | 220          |     |
| R Caudate                       |                                 |                     | -9, 5, 6                                     | 199          |     |
| L Caudate                       |                                 | 21                  | -50, -40, 6                                  | 163          |     |
| L Superior Temporal Gyrus       |                                 | 32                  | -4, 39, 25                                   | 151          |     |
| L Cingulate Gyrus               |                                 | 37                  | 35, -53, -20                                 | 95           |     |
| R Fusiform Gyrus                |                                 | 37                  | -38, -50, -17                                | 75           |     |
| L Fusiform Gyrus                |                                 | 22                  | 49, -26, -1                                  | 75           |     |
| R Superior Temporal Gyrus       |                                 | 10                  | -18, 55, 29                                  | 58           |     |
| L Superior Frontal Gyrus        |                                 |                     | -17, 1, 20                                   | 55           |     |
| L Caudate                       |                                 |                     | 1, -53, -35                                  | 43           |     |
| R Cerebellum                    |                                 | 8                   | -13, 39, 48                                  | 33           |     |
| L Superior Frontal Gyrus        |                                 | 10                  | 7, 60, 17                                    | 27           |     |
| R Frontopolar Gyrus             |                                 | 10                  | -1, 58, 9                                    | 24           |     |

|                          |       |              |    |
|--------------------------|-------|--------------|----|
| L Frontopolar Gyrus      | 17    | 8, -93, -2   | 24 |
| R Striate Area           | 6     | 42, 4, 40    | 21 |
| R Precentral Gyrus       |       | -20, -5, -13 | 17 |
| L Amygdala               | 8     | 10, 19, 38   | 15 |
| R Superior Frontal Gyrus | 6     | 54, -4, 39   | 15 |
| R Medial Frontal Gyrus   | 47/12 | -26, 27, -15 | 13 |
| L vIPFC                  |       | -7, -14, -16 | 12 |
| L Substantia Nigra       | 45    | -29, 23, 12  | 11 |
| L Frontal Operculum      | 8     | 48, 7, 50    | 11 |
| R Medial Frontal Gyrus   |       |              |    |

**Supplemental Table S4.** Non-overlapping clusters of Rej-Neu & Acc-Neu contrasts controlling for sex and age (whole-brain, no masking).

### Supplemental Methods

The SFT did not involve deception, however participants were asked to imagine that the profiles they were rating and the feedback they received were real. A previous study showed that social exclusion was aversive even when participants knew that they were being excluded by a computer during Cyberball, or when they knew that others (unseen and unmet) were following a script to exclude them<sup>4</sup>. In several pilot studies, we maximized the emotional impact of the SFT without using deception by 1) having participants pre-select their most-liked profiles, thus personalizing the task for each participant and 2) having participants submit their own photo, which was presented during the task (**Fig. 1**). These procedures helped to create an immersive experience and made it easy for participants to access genuine emotional responses from the feedback, without using deception. Our manipulation checks (see Results) showed that without deception, the mean response was above “moderately” for all three manipulation check questions, suggesting that the SFT produced emotional responses that were more than moderately similar to real-life situations. The SFT without deception has been used in our previous studies<sup>3,5-7</sup>. To ensure that participants understood the meaning of the feedback, participants were given the following instructions prior to performing the task:

‘You will see a picture of yourself, followed by a picture of someone you liked. Below his/her picture, you will see whether or not s/he likes you, based on your picture and the information that you provided about yourself. His/her answer to the question “Would I like this person?” are categorized as follows:

"very likely no" or "definitely no" = this person does not like you.

"very likely yes" or "definitely yes" = this person likes you.

"not completed" = this person left the study early and did not complete the profile ratings.’

### References

1. Gusnard, D. A., Raichle, M. E. & Raichle, M. E. Searching for a baseline: functional imaging and the resting human brain. *Nat. Rev. Neurosci.* **2**, 685–694 (2001).
2. Cavanna, A. E. & Trimble, M. R. The precuneus: a review of its functional anatomy and behavioural correlates. *Brain J. Neurol.* **129**, 564–583 (2006).
3. Hsu, D. T. *et al.* Response of the  $\mu$ -opioid system to social rejection and acceptance. *Mol. Psychiatry* **18**, 1211–1217 (2013).
4. Zadro, L., Williams, K. D. & Richardson, R. How low can you go? Ostracism by a computer is sufficient to lower self-reported levels of belonging, control, self-esteem, and meaningful existence. *J. Exp. Soc. Psychol.* **40**, 560–567 (2004).



5. Hsu, D. T. *et al.* It still hurts: altered endogenous opioid activity in the brain during social rejection and acceptance in major depressive disorder. *Mol. Psychiatry* **20**, 193–200 (2015).
6. Yttredahl, A. A. *et al.* Abnormal emotional and neural responses to romantic rejection and acceptance in depressed women. *J. Affect. Disord.* **234**, 231–238 (2018).
7. Sankar, A. *et al.* Dissociable Neural Responses to Monetary and Social Gain and Loss in Women With Major Depressive Disorder. *Front. Behav. Neurosci.* **13**, 149 (2019).
